# Supplementary material
Source: publisher figshare collection journal article supplement (https://gsajournals.figshare.com/ndownloader/files/14676752)
Supplement: Supplementary file 1 [file 14676752]

FullName	Comp1	Comp2	Comp3
Ames2338:81N4HABXX:7:250033662	0.0449	0.0531	0.9019
PI601558:81FENABXX:3:250034836	0	0	1
PI267166:81FENABXX:6:250035220	0.0896	0.0791	0.8313
PI601005:81FE8ABXX:3:250032182	0	0	1
PI601559:81FE8ABXX:1:250031915	0.8718	0	0.1282
PI601808:81FE8ABXX:1:250031936	0.7764	0	0.2236
PI601560:81N4HABXX:6:250033611	0.0784	0.0466	0.875
PI415088:81FE8ABXX:4:250032331	0.0175	0.0953	0.8871
PI601300:81FE8ABXX:1:250031885	0.4733	0.0096	0.5171
PI198894:81FE8ABXX:5:250032470	0.0585	0.121	0.8205
PI198901:81FENABXX:5:250035090	0.0751	0.1196	0.8054
PI601745:81FE7ABXX:6:250031639	0.8103	0	0.1897
Ames2336:81FE7ABXX:5:250031533	0.0694	0.1137	0.8169
PI601269:81N4HABXX:7:250033718	0	0.0742	0.9258
PI358532:81N4HABXX:5:250033411	0.0843	0.1539	0.7618
PI601561:81FE7ABXX:4:250031396	0.0106	0.0351	0.9543
PI601489:81FENABXX:1:250033809	0	0	1
PI601374:81FE8ABXX:5:250032400	0.9758	0	0.0241
PI601301:81FE7ABXX:4:250031364	1	0	0
PI601210:81FENABXX:1:250033834	1	0	0
PI601211:81N4HABXX:7:250033651	1	0	0
PI601438:81N4HABXX:6:250033530	0	0	1
PI601562:81FENABXX:3:250034800	0	0	1
PI601491:81N4HABXX:6:250033546	0.9757	0.0243	0
NSL243016:81N4HABXX:6:250033579	0.9124	0.0026	0.085
PI601492:81FE8ABXX:5:250032460	1	0	0
PI601377:81FENABXX:1:250033866	1	0	0
PI601563:81N4HABXX:6:250033533	0.8162	0.0038	0.18
Ames12814:81FE8ABXX:1:250031891	0.2517	0.0417	0.7066
Ames12819:81FE8ABXX:1:250031873	0.1459	0.025	0.8291
Ames12821:81FE8ABXX:1:250031934	0.1689	0.0379	0.7932
Ames12823:81N4HABXX:6:250033553	0.271	0.0122	0.7169
NSL30903:81FENABXX:2:250034669	0.1192	0.0806	0.8003
PI406106:81FE7ABXX:4:250031457	0	0.0073	0.9927
PI221735:81N4HABXX:3:250033210	0.0854	0.1167	0.798
Ames23398:81FENABXX:2:250034722	0.0824	0.1223	0.7954
Ames23402:81FENABXX:4:250034979	0.1081	0.0873	0.8046
Ames23405:81FE8ABXX:6:250032535	0.0885	0.0453	0.8662
Ames23406:81FE8ABXX:5:250032412	0.1104	0.0854	0.8042
NSL81596:81FENABXX:3:250034882	0.1033	0.0462	0.8505
Ames23408:81FENABXX:3:250034827	0.1567	0.0603	0.783
Ames23415:81FENABXX:2:250034736	0.0396	0.0776	0.8828
PI221811:81FENABXX:5:250035101	0.0577	0.1224	0.8199
Ames23417:81FE8ABXX:5:250032420	0.0842	0.0985	0.8174
Ames23423:81FE8ABXX:5:250032440	0.0993	0.0867	0.814
Ames23426:81FE8ABXX:5:250032399	0.0688	0.0798	0.8514
Ames23430:81FE8ABXX:6:250032597	0.097	0.1024	0.8005
Ames23449:81FE8ABXX:6:250032536	0.1134	0.0237	0.8629
Ames23456:81N4HABXX:5:250033425	0.085	0.0556	0.8594
PI587139:81N4HABXX:6:250033566	0	0	1
Ames23458:81N4HABXX:2:250033051	0	0	1
Ames23461:81FE8ABXX:6:250032595	0.0814	0.0942	0.8244
Ames23463:81FE8ABXX:5:250032436	0.1018	0.0721	0.8261
Ames23464:81FE8ABXX:6:250032533	0.0749	0.0629	0.8622
PI587140:81FE8ABXX:1:250031900	0.9421	0	0.0579
Ames23468:81FE8ABXX:6:250032510	0.9397	0	0.0603
Ames23469:81FE8ABXX:1:250031880	0.885	0	0.115
Ames23470:81N4HABXX:6:250033601	0.9181	0	0.0819
Ames19308:81N4HABXX:4:250033343	0.8419	0.0039	0.1542
Ames19309:81FE7ABXX:4:250031394	0.853	0	0.147
Ames23474:81FE8ABXX:5:250032426	0.8668	0.0055	0.1277
Ames23478:81FE8ABXX:6:250032592	0.0813	0.0817	0.837
Ames23479:81FE8ABXX:5:250032422	0.0939	0.0504	0.8556
Ames23480:81FE8ABXX:5:250032452	0.0618	0.0324	0.9058
Ames23488:81FE8ABXX:6:250032572	0.5092	0.0327	0.4581
NSL81599:81FENABXX:7:250034628	0.0976	0.0328	0.8696
NSL81600:81FENABXX:3:250034831	0.0796	0.0389	0.8815
PI607523:81FE8ABXX:6:250032539	0.0976	0.0724	0.83
PI607524:81FE8ABXX:3:250032195	0.7282	0.0065	0.2653
Ames23494:81FENABXX:3:250034838	0.1228	0	0.8772
Ames23495:81FENABXX:7:250034605	0.0473	0.082	0.8707
Ames23502:81FE8ABXX:6:250032598	0.122	0.0649	0.8131
Ames23503:81FE7ABXX:6:250031669	1	0	0
PI567794:81FE8ABXX:6:250032526	0.052	0.1683	0.7796
Ab18:81FENABXX:5:250035064	0	0.9717	0.0282
Ames22792:81FENABXX:3:250034854	0.1104	0.1117	0.7779
Ames28974:81FE7ABXX:5:250031546	0	0.9593	0.0407
Ames28990:81FENABXX:5:250035123	0.0176	0.9651	0.0173
Ames28981:81N4HABXX:7:250033657	0.0142	0.9309	0.0549
Ames28985:81FENABXX:5:250035059	0	1	0
Ames28994:81FENABXX:4:250034931	0	1	0
Ames28995:81FE7ABXX:3:250031298	0.0021	0.9755	0.0224
Ames28987:81FENABXX:4:250035015	0	1	0
Ames28988:81FENABXX:5:250035097	0	1	0
Ames28984:81FE7ABXX:3:250031266	0	1	0
Ames28977:81FENABXX:2:250034683	0	0.9543	0.0457
Ames28991:81FE7ABXX:2:250031202	0	1	0
Ames28996:81FE7ABXX:1:250030986	0.013	0.9101	0.077
Ames28980:81FENABXX:2:250034716	0	0.9758	0.0242
Ames28992:81FENABXX:4:250034972	0	1	0
Ames29030:81N4HABXX:7:250033707	0	0.9717	0.0283
Ames28986:81FENABXX:3:250034820	0.0313	0.9593	0.0094
Ames28999:81FENABXX:1:250033777	0	1	0
Ames28989:81FE7ABXX:1:250031007	0	0.9069	0.093
Ames29010:81FENABXX:1:250033808	0	1	0
Ames29011:81FE7ABXX:5:250031506	0	1	0
Ames29012:81FENABXX:1:250033827	0	1	0
Ames29013:81N4HABXX:6:250033604	0	1	0
Ames29014:81FE7ABXX:5:250031528	0	1	0
Ames29015:81N4HABXX:6:250033606	0	1	0
Ames29016:81N4HABXX:7:250033715	0	1	0
Ames29017:81FE7ABXX:5:250031561	0	1	0
Ames29018:81FE7ABXX:5:250031543	0	1	0
Ames29019:81FE7ABXX:4:250031448	0	1	0
Ames29002:81FE7ABXX:4:250031421	0	1	0
Ames29020:81FE7ABXX:3:250031295	0	1	0
Ames29021:81FE7ABXX:4:250031368	0	1	0
Ames29003:81FE7ABXX:6:250031705	0	1	0
Ames29004:81FENABXX:2:250034706	0	1	0
Ames29005:81FE7ABXX:5:250031510	0	1	0
Ames29007:81N4HABXX:7:250033698	0	1	0
Ames29008:81FENABXX:2:250034712	0	1	0
Ames29009:81FENABXX:1:250033795	0	1	0
Ames29022:81FE7ABXX:6:250031706	0	1	0
NSL437910:81FENABXX:4:250034992	0.7254	0.0332	0.2414
NSL437933:81FENABXX:4:250034963	0.0366	0.0404	0.923
NSL437934:81FENABXX:5:250035138	0.0562	0.0491	0.8946
NSL437962:81FE7ABXX:1:250030995	0.4104	0.0182	0.5714
NSL437992:81FENABXX:6:250035203	1	0	0
NSL438019:81FENABXX:3:250034807	0.6364	0	0.3636
NSL438022:81FE7ABXX:2:250031166	0.053	0.0182	0.9288
NSL438034:81FENABXX:4:250034958	1	0	0
NSL438036:81FE7ABXX:1:250031071	0.0041	0.0285	0.9675
PI340841:81FE7ABXX:2:250031170	0	0.9996	4.00E-04
PI340860:81N4HABXX:7:250033699	0.0246	0.4612	0.5141
PI340838:81FE7ABXX:1:250031016	0.0472	0.3544	0.5984
PI340839:81FE7ABXX:2:250031139	0.027	0.5832	0.3898
PI584529:81FENABXX:6:250035176	0.0159	0.0299	0.9542
PI594045:81FENABXX:2:250034759	0.0074	0.0273	0.9653
PI594048:81FENABXX:3:250034886	0.4045	0.0164	0.5791
PI594049:81FE7ABXX:2:250031130	0.0321	0.0635	0.9044
PI597925:81FE7ABXX:3:250031325	0.1161	0	0.8839
PI597926:81FE7ABXX:1:250031033	0.1445	0.0704	0.7851
PI597927:81FE7ABXX:1:250030983	0.9595	0	0.0405
PI607382:81FENABXX:4:250035011	0.397	0.0188	0.5843
PI607383:81FE7ABXX:3:250031320	0.0991	0.0823	0.8186
PI607384:81FE7ABXX:2:250031128	0.1169	0	0.8831
PI632746:81FE7ABXX:1:250031010	0.0849	0.0284	0.8867
NSL65866:81FE7ABXX:5:250031578	1	0	0
PI550461:81FE7ABXX:5:250031584	1	0	0
Ames27066:81FE8ABXX:7:250032840	0.1573	0.0536	0.7892
PI550467:81FE7ABXX:1:250030985	0.4887	0	0.5113
NSL30046:81FENABXX:5:250035132	0.0283	0	0.9717
PI550469:81FE7ABXX:1:250030991	0.2183	0.0127	0.769
PI601009:81FE8ABXX:1:250031950	0.3872	0.0142	0.5986
PI608764:81FENABXX:4:250034944	0.1073	0	0.8927
PI550472:81FENABXX:4:250034982	0.0854	0.1015	0.813
PI550462:81FE7ABXX:5:250031535	0.8667	0	0.1333
PI550455:81FENABXX:5:250035053	0.4983	0	0.5017
NSL65863:81FENABXX:1:250033778	0.1563	0.0314	0.8123
PI550466:81FE7ABXX:3:250031293	0	0.0028	0.9972
PI550473:81FE7ABXX:6:250031665	1	0	0
Ames8397:81FE7ABXX:5:250031568	1	0	0
Ames27065:81FE7ABXX:5:250031573	1	0	0
PI608774:81N4HABXX:6:250033616	0.0989	0.0414	0.8597
PI550483:81FE7ABXX:5:250031544	0.429	0.0092	0.5617
PI608765:81N4HABXX:7:250033664	0.0922	0.1007	0.8071
PI608766:81FE7ABXX:6:250031646	0.2541	0.0313	0.7146
PI608777:81FE7ABXX:3:250031255	0.0465	0.0587	0.8948
PI608768:81FENABXX:3:250034848	0.1047	0.046	0.8492
PI550556:81FENABXX:4:250035005	0.2347	0.0346	0.7307
PI509542:81FENABXX:5:250035130	0.3807	0.0144	0.6049
PI527700:81FE7ABXX:1:250031003	0.0905	0.0385	0.871
PI539870:81FE8ABXX:1:250031917	0	0.0064	0.9936
PI539871:81FE8ABXX:6:250032542	0	0.0029	0.9971
PI539872:81FENABXX:5:250035092	0.3976	0.0135	0.5889
PI564682:81FENABXX:1:250033788	0.0822	0.0374	0.8805
PI584528:81FE7ABXX:6:250031647	0.0739	0.0264	0.8997
Ames2332:81FE7ABXX:4:250031367	0.0739	0.0802	0.8459
Ames19284:81FE8ABXX:7:250032795	0	0.0163	0.9837
Ames19313:81N4HABXX:6:250033580	0.0034	0.0775	0.9191
PI221820:81FE7ABXX:6:250031661	0.0666	0.1306	0.8028
Ames22441:81FE8ABXX:4:250032253	0.1242	0.049	0.8268
Ames27017:81FENABXX:3:250034866	0.0875	0.0534	0.859
Ames27018:81N4HABXX:5:250033460	0.0016	0.0048	0.9936
Ames27019:81FE8ABXX:5:250032438	0.5924	0.0326	0.3751
Ames27020:81FE8ABXX:6:250032550	0.5826	0.0152	0.4022
PI391660:81FE7ABXX:5:250031559	0.0952	0.0293	0.8755
Ames26120:81FENABXX:3:250034828	0.0935	0.0761	0.8304
Ames26132:81FE7ABXX:2:250031125	0.0889	0.077	0.8342
Ames26134:81FENABXX:4:250034953	0.1203	0.0452	0.8344
CIze45:81FENABXX:3:250034850	0.0912	0.0844	0.8245
Ames22440:81FE7ABXX:1:250030998	0.498	0	0.502
CML116:81FE7ABXX:6:250031673	0.0544	0.0809	0.8648
CML211:81FE7ABXX:5:250031534	0.0686	0.1048	0.8266
CML326:81FE7ABXX:7:250031780	0.1032	0.1249	0.7719
CML365:81N4HABXX:3:250033164	0.0789	0.1111	0.8099
CML456:81N4HABXX:3:250033142	0.1214	0.1192	0.7595
Ames27051:81FE8ABXX:4:250032283	0.3098	0	0.6902
Ames27053:81FE8ABXX:4:250032316	0.4482	0.0075	0.5443
PI606329:81FE7ABXX:2:250031148	0.0149	0.0016	0.9835
PI638552:81FE7ABXX:1:250031002	0.1112	0.0402	0.8486
PI550558:81FE7ABXX:5:250031524	0.5139	0.0215	0.4646
PI601191:81FE7ABXX:6:250031638	1	0	0
PI221747:81FE8ABXX:7:250032768	0.0812	0.1133	0.8055
PI601724:81FENABXX:2:250034748	0.0359	0.0096	0.9545
Ames2330:81N4HABXX:6:250033592	0.0797	0.0885	0.8318
PI427109:81N4HABXX:6:250033593	0.0997	0.1144	0.7859
Ames27112:81N4HABXX:2:250033030	0.0787	0.1291	0.7923
PI257516:81FENABXX:6:250035244	0.0691	0.175	0.7559
PI600958:81FE7ABXX:4:250031412	0.6947	0	0.3053
PI601439:81FE7ABXX:2:250031195	0.5994	0.0156	0.3849
PI600772:81FENABXX:4:250034966	0.4383	0.0273	0.5345
PI601037:81FE7ABXX:6:250031660	0.4082	0.0072	0.5846
GA220:81FE8ABXX:4:250032266	0.0807	0.0306	0.8887
Ames10254:81N4HABXX:3:250033198	0.1008	0.0921	0.8072
PI511313:81FE7ABXX:7:250031752	0.1432	0.1161	0.7407
PI511318:81FE7ABXX:7:250031754	0.0576	0.1639	0.7785
Ames22748:81FE7ABXX:3:250031306	0.8087	0	0.1913
PI550497:81FE7ABXX:4:250031369	0.1355	0.0743	0.7903
Ames22749:81N4HABXX:7:250033672	0	0	1
PI587127:81FE7ABXX:5:250031574	0.6455	0.0371	0.3174
Ames26800:81FE7ABXX:5:250031557	0.3769	0.0306	0.5925
Ames19318:81FE7ABXX:4:250031436	0.0554	0.0068	0.9378
Ames26801:81FENABXX:1:250033801	0	0	1
Ames26802:81FENABXX:1:250033803	0	0	1
PI550527:81N4HABXX:4:250033357	0.6324	0.0153	0.3523
Ames22750:81N4HABXX:6:250033560	0.0987	0	0.9013
Ames26803:81N4HABXX:7:250033724	0.1581	0.0673	0.7746
Ames22751:81N4HABXX:7:250033739	0.4157	0.0135	0.5708
Ames26804:81FE7ABXX:5:250031495	0.066	0.0485	0.8855
Ames22753:81FE7ABXX:5:250031531	0.9096	0	0.0904
PI583846:81FENABXX:5:250035070	0	0.0116	0.9884
Ames26785:81FENABXX:1:250033820	0.0455	0	0.9545
Ames15929:81FENABXX:1:250033855	0.0341	0.0034	0.9625
Ames26794:81FENABXX:2:250034719	0.0801	0.0989	0.821
PI587128:81FE7ABXX:4:250031400	0.397	0.0235	0.5795
PI601610:81FE7ABXX:3:250031302	0.6238	0.0339	0.3424
Ames26796:81FE7ABXX:4:250031437	0.4887	0	0.5113
Ames19319:81FE7ABXX:6:250031680	0.0257	0.0346	0.9397
Ames26798:81FE7ABXX:3:250031326	0.0866	0	0.9134
PI587129:81FENABXX:2:250034734	0.0061	0.0205	0.9734
PI601564:81FE8ABXX:5:250032383	0.4655	0.0322	0.5023
PI601172:81FENABXX:5:250035080	0.1985	0.0306	0.7708
PI587131:81FENABXX:4:250034929	0	1	0
PI542776:81FENABXX:4:250034949	0	1	0
NSL30864:81FENABXX:2:250034698	0.2142	0.0173	0.7684
I205:MRG:2:250040145	0.2261	0.0088	0.7651
Ames27115:81N4HABXX:5:250033453	0.0527	0.4035	0.5438
NSL75971:81FE7ABXX:6:250031664	0.0257	0.478	0.4963
Ames22025:81FENABXX:1:250033800	0.0539	0.1857	0.7604
PI340875:81FE8ABXX:7:250032841	0.0538	0.3327	0.6135
PI340876:81FE7ABXX:2:250031167	0.0217	0.8191	0.1593
NSL75976:81FENABXX:4:250035004	0.0237	0.4978	0.4785
NSL75977:81FENABXX:2:250034755	0	0.9486	0.0514
Ames22030:81N4HABXX:6:250033617	0.0477	0.1887	0.7636
PI601208:81FE8ABXX:5:250032429	0	0	1
PI601565:81FE7ABXX:4:250031391	0.2392	0	0.7608
PI601458:81FE8ABXX:1:250031890	0.0099	0	0.9901
PI601459:81FE8ABXX:6:250032594	0	0	1
Ames24575:81FE7ABXX:1:250031070	0.0122	0.5696	0.4182
Ames24576:81FENABXX:4:250035010	0	1	0
Ames24577:81FENABXX:4:250034969	0	1	0
Ames27120:81FE7ABXX:7:250031769	0.0533	0.1807	0.7661
Ames27446:81N4HABXX:7:250033730	0.0623	0.1608	0.7769
PI186227:81FE8ABXX:1:250031901	0.0661	0.1224	0.8116
PI186218:81FENABXX:1:250033797	0.0595	0.1204	0.8201
PI601725:81N4HABXX:6:250033600	0	0	1
Ames27122:81FE8ABXX:7:250032762	0.0773	0.0915	0.8312
NSL22630:81FENABXX:6:250035258	0.1164	0.089	0.7946
Ames22754:81FE7ABXX:5:250031565	0.088	0.1252	0.7868
NSL30863:81FE7ABXX:1:250031011	0.1244	0.0604	0.8152
NSL65873:81FE8ABXX:7:250032823	0.0431	0.0871	0.8698
PI644101:81FE7ABXX:2:250031192	0.3193	0	0.6807
PI600954:81N4HABXX:5:250033455	1	0	0
PI601079:81FE7ABXX:4:250031456	0.0696	0	0.9304
PI538007:81FE8ABXX:7:250032771	0.0603	0	0.9397
PI547086-1:81FENABXX:7:250034631	0.0204	0.0233	0.9563
PI601004:81N4HABXX:6:250033532	1	0	0
PI539922:81FE7ABXX:4:250031430	1	0	0
PI539926:81N4HABXX:6:250033572	0.8861	0.0078	0.1061
PI539927:81FE7ABXX:4:250031434	0.9972	0	0.0028
PI539923:81FENABXX:2:250034739	0.8413	0	0.1587
PI537097:81FENABXX:1:250033872	0.9154	0	0.0846
PI538009:81FENABXX:1:250033869	1	0	0
PI537099:81FE7ABXX:4:250031441	1	0	0
PI547088-1:81FENABXX:7:250034564	0.8865	0	0.1135
PI538011:81FE7ABXX:4:250031414	0.9285	0	0.0715
PI600791:81N4HABXX:5:250033467	0	0	1
PI600944:81N4HABXX:1:250032906	0	0	1
PI600955:81FE7ABXX:4:250031416	0	0	1
PI601317:81FENABXX:1:250033829	0	0	1
PI601466:81FE8ABXX:3:250032185	0	0	1
PI601404:81N4HABXX:1:250032892	0.0031	0.0172	0.9797
PI601494:81N4HABXX:6:250033535	0	0	1
PI600957:81FE8ABXX:5:250032450	1	0	0
PI601170:81FE8ABXX:6:250032540	0.0794	0.0202	0.9004
PI601171:81N4HABXX:7:250033705	0.0709	0.0733	0.8558
PI600755:81FENABXX:2:250034718	1	0	0
PI600729:81FE7ABXX:4:250031458	1	0	0
NSL30867:81FE8ABXX:1:250031956	0.1021	0.045	0.853
PI601209:81FE7ABXX:4:250031398	0	0.003	0.997
PI601440:81FENABXX:1:250033864	0.0499	0.0221	0.9281
PI601566:81FE7ABXX:3:250031261	0	0	1
PI600956:81FE7ABXX:5:250031548	0	0.015	0.985
Ames26004:81N4HABXX:5:250033478	0.0735	0.2228	0.7037
PI583774:81FENABXX:3:250034846	0	0	1
PI558518:81N4HABXX:1:250032900	0.0784	0.103	0.8186
PI558532:81FE7ABXX:4:250031418	0	0	1
PI558520:81FE8ABXX:7:250032816	0.0377	0.0105	0.9518
Ames28361:81FE7ABXX:1:250031072	0.0299	0	0.9701
Ames20120:81FE7ABXX:2:250031157	0	0	1
PI583350:81FE7ABXX:4:250031424	0.1609	0.0463	0.7928
PI583351:81FE7ABXX:5:250031560	0.1324	0.0368	0.8308
PI583352:81N4HABXX:7:250033675	0.176	0.0735	0.7505
PI634206:81FENABXX:2:250034710	0.114	0.0829	0.8031
PI634207:81FE7ABXX:5:250031551	0.1475	0.0581	0.7944
Ames28947:81FENABXX:5:250035142	0.0642	0.0954	0.8404
Ames22442:81FE8ABXX:6:250032551	0.0565	0.088	0.8555
Ames24729:81N4HABXX:6:250033552	0.1063	0.0787	0.815
Ames24730:81N4HABXX:3:250033197	0.1017	0.0388	0.8596
Ames24737:81FE8ABXX:5:250032445	0.078	0.0837	0.8382
Ames24739:81N4HABXX:6:250033603	0.0707	0.0585	0.8708
Ames24742:81FE8ABXX:5:250032447	0.1021	0.1086	0.7894
Ames24743:81FE8ABXX:6:250032553	0.0974	0.0448	0.8578
Ames24744:81FENABXX:4:250034928	0.0953	0.0913	0.8134
Ames24746:81FENABXX:7:250034629	0.6249	0	0.3751
Ames24748:81FE8ABXX:6:250032522	0.086	0.0669	0.8472
Ames24749:81FENABXX:3:250034839	0.0647	0.0449	0.8904
Ames24751:81FE8ABXX:5:250032432	0.3314	0.024	0.6447
Ames24707:81FENABXX:2:250034758	0.0646	0.1077	0.8278
Ames24709:81FE8ABXX:6:250032528	0.0568	0.0143	0.9289
Ames24711:81FE8ABXX:6:250032545	0.0665	0.0139	0.9196
Ames24712:81N4HABXX:6:250033531	0.1152	0.06	0.8248
Ames24713:81FENABXX:3:250034804	0.1043	0.081	0.8147
Ames24717:81FE8ABXX:6:250032544	0.5795	0	0.4204
Ames24720:81FE8ABXX:4:250032290	0.0874	0.0822	0.8304
Ames24721:81FENABXX:3:250034871	0.2443	0.0374	0.7184
PI550566:81N4HABXX:6:250033594	0.9608	0	0.0392
PI568158:81N4HABXX:7:250033741	0.1478	0.043	0.8091
PI568159:81FE8ABXX:5:250032406	0.1476	0.0516	0.8007
PI595366:81FENABXX:3:250034822	0.4523	0.0083	0.5394
PI596355:81FE8ABXX:5:250032414	0.146	0.0084	0.8456
PI596356:81FE8ABXX:5:250032396	0.7908	0	0.2092
Ames27138:81FE7ABXX:5:250031505	0.3829	0.0179	0.5992
PI594050:81N4HABXX:6:250033561	0.4577	0.0151	0.5271
PI594051:81FE8ABXX:1:250031945	0.5353	0.0063	0.4585
PI594052:81FE8ABXX:1:250031902	0.4052	0.0087	0.5861
PI594054:81FE8ABXX:4:250032289	0.3873	0.0012	0.6116
PI594058:81N4HABXX:2:250033045	0.4186	0.0026	0.5788
PI594062:81N4HABXX:6:250033525	0.3793	0.009	0.6117
PI594065:81FE8ABXX:1:250031946	0.3636	0.0174	0.619
PI594070:81N4HABXX:6:250033578	0.4004	0.0127	0.5869
PI594071:81FE8ABXX:1:250031914	0.3644	0.0034	0.6322
PI594072:81FE8ABXX:1:250031957	0.4735	0.0181	0.5085
PI594076:81N4HABXX:6:250033586	0.1541	0.0088	0.8371
PI594077:81FE8ABXX:1:250031893	0.1421	0.011	0.847
PI594078:81FE8ABXX:1:250031940	0.139	0	0.861
PI594079:81FE8ABXX:4:250032321	0.1428	0	0.8572
PI594080:81FE8ABXX:1:250031961	0.1306	0.0095	0.8599
PI594089:81FE8ABXX:1:250031921	0.3739	0.0115	0.6145
PI597578:81N4HABXX:6:250033591	0.1313	0.0644	0.8043
PI638549:81N4HABXX:6:250033574	0.7104	0.0126	0.2771
PI638550:81FE8ABXX:5:250032446	0.4172	0.0092	0.5736
Ames27137:81N4HABXX:7:250033666	0.0903	0.1319	0.7777
PI221743:81FE8ABXX:6:250032602	0.0816	0.1067	0.8117
PI607512:81FENABXX:2:250034717	0.3467	0.0232	0.6301
PI592741:81FENABXX:1:250033859	0.3209	0.0604	0.6187
Ames12732:81N4HABXX:1:250032896	0.0737	0.0693	0.857
PI550555:81FENABXX:1:250033796	0.3645	0.0329	0.6026
PI511309:81FENABXX:1:250033819	1	0	0
PI511310:81FE7ABXX:3:250031269	1	0	0
PI511311:81FENABXX:2:250034705	1	0	0
Ames27140:81FENABXX:4:250034930	0.0829	0.0438	0.8734
PI531085:81FENABXX:2:250034667	0	0.0617	0.9383
Ames28412:81FE7ABXX:6:250031628	0	0.0597	0.9403
Ames28417:81FE7ABXX:2:250031131	0.6876	0.0273	0.285
Ames28419:81FENABXX:4:250034961	0.8188	0.0286	0.1526
Ames28420:81FE7ABXX:3:250031283	0.8365	0.0266	0.1368
Ames28421:81FE7ABXX:1:250030990	1	0	0
Ames28422:81FENABXX:3:250034799	1	0	0
Ames28423:81FE7ABXX:2:250031111	0.958	0	0.042
Ames28425:81FENABXX:3:250034861	0.0146	0.0639	0.9215
Ames28426:81FENABXX:5:250035125	0	0.0596	0.9404
Ames27141:81FE7ABXX:3:250031331	0	0.0607	0.9393
Ames27142:81FENABXX:1:250033784	1	0	0
Ames27147:81N4HABXX:2:250033039	0.074	0.1068	0.8191
Ames27150:81FE7ABXX:2:250031126	0.8808	0	0.1192
Ames27151:81FENABXX:4:250034926	0.986	0	0.014
Ames27160:81FE7ABXX:3:250031274	0.9977	0	0.0022
Ames27161:81FE7ABXX:3:250031303	1	0	0
Ames27167:81FE7ABXX:1:250031050	0	0.0592	0.9408
Ames27168:81FE7ABXX:6:250031622	0	0.0567	0.9433
Ames27178:81N4HABXX:7:250033696	0.0239	0.0949	0.8812
Ames27182:81FE7ABXX:5:250031570	1	0	0
PI607527:81FE8ABXX:4:250032264	0.0722	0.0788	0.849
NSL32736:81FENABXX:6:250035212	0.1265	0.0938	0.7797
PI303929:81FE8ABXX:7:250032848	0.1032	0.0739	0.8229
PI303930:81FE7ABXX:3:250031319	0.0875	0.0994	0.8131
PI303932:81FE8ABXX:1:250031932	0.0827	0.1039	0.8134
PI303933:81FE8ABXX:6:250032531	0.0707	0.1234	0.8059
PI303940:81FE7ABXX:3:250031280	0.0725	0.1096	0.8179
PI303941:81FE7ABXX:6:250031697	0.0941	0.1079	0.798
PI542715:81FE8ABXX:1:250031926	0.0247	0.783	0.1923
PI542716:81N4HABXX:5:250033423	0.0474	0.8335	0.1192
PI601417:81FE7ABXX:5:250031507	1	0	0
PI200189:81FE8ABXX:6:250032514	0.0639	0.1061	0.83
PI610494:81FENABXX:1:250033842	0.1107	0.1063	0.7831
PI561695:81FENABXX:2:250034735	0.1179	0.0759	0.8062
PI561694:81FE8ABXX:6:250032563	0	0.0145	0.9855
PI553063:81FE7ABXX:4:250031393	0.082	0.2236	0.6944
PI596499:81FE7ABXX:4:250031409	0.0519	0.2393	0.7087
PI596501:81FE7ABXX:3:250031262	0.0796	0.1775	0.7429
PI596502:81FE7ABXX:5:250031493	0.0587	0.1397	0.8017
PI596503:81FENABXX:2:250034676	0.0591	0.1981	0.7428
PI553056:81FE7ABXX:3:250031329	0.056	0.1936	0.7504
PI553058:81FE7ABXX:5:250031569	8.00E-04	0.9501	0.0491
PI553060:81N4HABXX:7:250033673	0	0.9007	0.0992
PI553061:81FE7ABXX:4:250031406	0.053	0.3211	0.6259
NSL28965:81FE7ABXX:5:250031552	0.0885	0.0592	0.8523
NSL28966:81N4HABXX:6:250033589	0	0.0215	0.9785
NSL68211:81N4HABXX:6:250033607	0.0862	0.0846	0.8292
Ames19288:81FE8ABXX:5:250032389	0	0	1
NSL28967:81N4HABXX:5:250033491	0.1166	0.0025	0.8809
PI573098:81N4HABXX:6:250033558	0.0524	0.0422	0.9054
NSL28968:81FENABXX:7:250034567	0.1158	0.0946	0.7896
NSL65874:81N4HABXX:6:250033613	0.134	0.0485	0.8176
Ames22756:81FE8ABXX:1:250031925	0.1506	0.0369	0.8126
Ames22048:81FENABXX:3:250034795	0.0437	0.2007	0.7557
Ames22049:81FE7ABXX:4:250031435	0.0405	0.2228	0.7368
PI644102:81FE8ABXX:6:250032527	0.0692	0.1494	0.7814
PI531081:81FENABXX:2:250034682	0.2139	0.0532	0.7329
PI531082:81FENABXX:3:250034797	0.0929	0.0666	0.8405
Ames22757:81N4HABXX:6:250033587	0.0995	0.0814	0.819
PI517971:81N4HABXX:1:250032940	0.0564	0.0771	0.8665
PI560074:81FE7ABXX:5:250031492	0.9064	0	0.0936
PI560075:81N4HABXX:7:250033668	0.8535	0	0.1465
Ames27184:81FE7ABXX:5:250031512	0	0	1
PI560081:81FENABXX:1:250033791	0.1254	0.0123	0.8623
Ames19324:81FE7ABXX:2:250031199	0.0128	0.0393	0.9478
Ames27185:81FE7ABXX:5:250031571	0.0742	0.0839	0.8419
PI517972:81FE7ABXX:2:250031155	0.0708	0.0583	0.8709
PI587147:81FE7ABXX:1:250031030	0.0392	0.005	0.9557
PI601441:81FE7ABXX:1:250031013	1	0	0
PHB47:C00R8ABXX:2:250007187	0.3866	0.0161	0.5973
PI601270:81FENABXX:1:250033857	0	0	1
PI601008-1:81FENABXX:7:250034598	0.0261	0	0.9739
PI600981:81FENABXX:1:250033863	0.5921	0	0.4079
PI601006:81FE7ABXX:5:250031516	0.0725	0.1986	0.7288
PI601150:81FE8ABXX:5:250032418	0.4828	0	0.5172
PI601229:81FE7ABXX:5:250031564	0	0	1
PI601320:81FENABXX:4:250034941	0.0464	0.0255	0.9281
PI601442:81FENABXX:4:250034937	0.9562	0	0.0438
PI601567:81FE7ABXX:4:250031452	0.0092	0	0.9908
PI601773:81FE7ABXX:5:250031508	0.0651	0.0515	0.8834
PI601774:81N4HABXX:5:250033402	0.0234	0.0063	0.9703
PI601775:81FENABXX:1:250033835	0.6465	0	0.3535
PI601468:81FENABXX:2:250034700	0.672	0	0.3279
PI601777:81FE8ABXX:1:250031875	0.8007	0	0.1993
PI601495:81FENABXX:1:250033811	0	0	1
PI601778:81FENABXX:3:250034821	0.2117	0	0.7883
PI601568:81FE7ABXX:2:250031201	0	0	1
PI601497:81FE7ABXX:1:250030994	0.0029	0	0.9971
PI601780:81FE8ABXX:1:250031918	0.4324	0	0.5676
PI601782:81N4HABXX:5:250033466	0	0	1
PI601783:81FE7ABXX:6:250031695	0	0	1
PI601570:81FE8ABXX:5:250032468	0.0342	0	0.9658
PI601784:81FE8ABXX:1:250031952	0.0913	0	0.9087
PI601361:81FENABXX:6:250035224	0.0829	0.0482	0.8689
PI601572:81FENABXX:1:250033785	0.2287	0	0.7713
PI601786:81FE7ABXX:4:250031411	0.0133	0	0.9867
PI601573:81FENABXX:6:250035223	0.9148	0	0.0852
PI601788:81FE7ABXX:2:250031142	0.0108	0	0.9892
PI601498:81FENABXX:1:250033853	0.5696	0	0.4304
PI601574:81FENABXX:4:250035000	0.0207	0.0201	0.9593
PI601499:81FE7ABXX:2:250031159	0.0369	0.0019	0.9612
PI601470:81FE8ABXX:1:250031962	0.023	0	0.977
PI601362:81FE7ABXX:3:250031285	0.7896	0.0242	0.1862
PI601791:81FENABXX:4:250034985	0.1598	0.0623	0.7778
PI601792:81FENABXX:5:250035083	0.0423	0	0.9577
PI601575:81FENABXX:5:250035073	0.8056	0	0.1944
PI601501:81FE7ABXX:3:250031271	0.0108	0	0.9892
PI601576:81FE7ABXX:3:250031247	0.1433	0.0032	0.8534
PI601322-1:81FENABXX:7:250034578	0.0201	0.0242	0.9557
PI601190:81FE8ABXX:5:250032427	0	0	1
NSL30878:81FE7ABXX:4:250031427	0.0852	0.0481	0.8667
NSL30879:81FENABXX:1:250033849	0.1016	0.0479	0.8505
NSL242484:81FENABXX:1:250033779	0.0967	0.0806	0.8226
NSL30883:81FENABXX:2:250034677	0.0961	0.0596	0.8442
NSL30888:81FE7ABXX:5:250031572	0.108	0.0412	0.8508
NSL30890:81N4HABXX:7:250033678	0.0695	0.0526	0.8779
Ames19326:81N4HABXX:5:250033412	0.0884	0.0689	0.8427
NSL30894:81FE7ABXX:4:250031446	0.0441	0.0509	0.905
NSL30896:81FENABXX:1:250033826	0.1061	0.0368	0.857
NSL30898:81FE7ABXX:4:250031405	0.086	0.0501	0.8639
NSL30902:81FE7ABXX:3:250031243	0.1086	0.0667	0.8247
NSL30865:81FENABXX:2:250034744	0.125	0.0552	0.8198
NSL29317:81FE8ABXX:1:250031882	0.1019	0.0338	0.8643
Ames27187:81FENABXX:5:250035087	0.1127	0.0247	0.8626
NSL30872:81FENABXX:1:250033847	0.087	0.0416	0.8714
NSL30876:81FENABXX:1:250033813	0.0991	0.0739	0.827
NSL117226:81FE7ABXX:4:250031402	0.3871	0.0337	0.5792
NSL30907:81FENABXX:2:250034756	0.1293	0.0387	0.832
NSL30908:81N4HABXX:7:250033684	0.1581	0.0454	0.7965
PI340846:81FE7ABXX:6:250031707	0	1	0
PI369442:81FENABXX:6:250035263	0.0808	0.049	0.8701
PI601612:81FE7ABXX:4:250031380	0	0	1
Ames27188:81FE7ABXX:2:250031181	0	1	0
NSL30835:81FENABXX:2:250034702	0.1163	0.0493	0.8344
PI533659:81N4HABXX:4:250033273	0.1801	0	0.8199
PI606768:81FENABXX:3:250034808	0.1731	0	0.8269
PI606769:81FE8ABXX:5:250032407	0.0597	7.00E-04	0.9396
PI508277:81FENABXX:3:250034860	0.1793	0.0702	0.7505
PI524969:81FENABXX:2:250034681	0.052	0.0319	0.9161
PI524970:81FE8ABXX:5:250032455	0.1489	0	0.8511
PI538237:81FE8ABXX:4:250032330	0.5955	0.0473	0.3572
PI600751:81N4HABXX:7:250033671	0	0	1
NSL75980:81FE7ABXX:6:250031657	0.0098	0.906	0.0842
Sg1533:MRG:2:250040200	0	1	0
PI358521:81FENABXX:5:250035085	0.0616	0.1993	0.7391
PI358530:81FE7ABXX:4:250031432	0.0736	0.1774	0.749
PI358534:81FENABXX:2:250034713	0.0491	0.2066	0.7443
PI391663:81N4HABXX:1:250032921	0.076	0.1003	0.8237
PI340827:81FENABXX:7:250034560	0.0846	0.1042	0.8112
PI550521:81FE8ABXX:7:250032854	0.0582	0.009	0.9328
PI550522:81FE8ABXX:7:250032844	0.1768	0.1003	0.7229
PI340830:81FENABXX:2:250034707	0.0942	0.133	0.7728
PI509045:81N4HABXX:2:250033023	0.0592	0.1525	0.7883
PI550518:81FE8ABXX:7:250032792	0.0393	0.0819	0.8788
PI267171:81FENABXX:6:250035250	0.0668	0.0799	0.8533
Ames26022:81FENABXX:1:250033814	0.2222	0.0249	0.7529
Tx204:81FE8ABXX:7:250032767	0.2153	0.0093	0.7755
Tx205:81N4HABXX:1:250032935	0.2376	0.0068	0.7556
PI391678:81FE7ABXX:4:250031455	0.0788	0.0897	0.8315
PI587151:81FE8ABXX:1:250031935	0.022	0.0585	0.9195
Ames19001:81FENABXX:3:250034888	0.0534	0.0223	0.9243
Ames19002:81N4HABXX:2:250033017	0.0065	0.0193	0.9741
Ames19003:81N4HABXX:3:250033145	0.0525	0.0242	0.9233
Ames19328:81FE7ABXX:5:250031547	0.0202	0.038	0.9418
PI587149:81FE8ABXX:1:250031958	0.0242	0.0132	0.9626
PI587150:81FE7ABXX:5:250031501	0.0094	0.0688	0.9218
Ames19014:81N4HABXX:7:250033702	0.0017	0.0184	0.9799
Ames19016:81FE7ABXX:3:250031305	0	0.0572	0.9428
Ames27193:81FE7ABXX:5:250031520	0.0507	0.041	0.9083
Ames19019:81FENABXX:1:250033836	0.0476	0.0128	0.9395
Ames24989:81N4HABXX:7:250033695	0.1384	0.0137	0.8479
Ames19000:81FE7ABXX:3:250031259	0.0706	0.0512	0.8783
Ames22052:81FE8ABXX:4:250032312	0.0498	0.2089	0.7413
Ames22053:81FENABXX:3:250034856	0.0516	0.2289	0.7196
Ames22060:81FENABXX:7:250034542	0.07	0.1703	0.7597
NSL30053:81FE7ABXX:6:250031621	0.0735	0.0484	0.8781
PI520772:81FENABXX:7:250034593	0.4855	0	0.5144
NSL30058:81FENABXX:1:250033846	0.0417	0	0.9583
PI601502:81N4HABXX:6:250033565	1	0	0
WD456:81FE8ABXX:6:250032530	0.2621	0.0334	0.7045
Ames19293:81FE7ABXX:5:250031532	0.0184	0	0.9816
PI601685:81FE7ABXX:4:250031428	0	0.0102	0.9897
NSL30066:81FE8ABXX:5:250032454	0.0901	0.0798	0.8301
Ames26742:81N4HABXX:7:250033733	0.0892	0.1123	0.7985
Ames26745:81FENABXX:1:250033805	0.176	0.0245	0.7995
Ames26747:81FE7ABXX:6:250031650	0.1704	0.0338	0.7958
Ames26750:81FE7ABXX:3:250031251	0.0543	0.1965	0.7492
PI391682:81N4HABXX:6:250033536	0.069	0.1126	0.8184
PI391665:81FE8ABXX:6:250032589	0.0951	0.1061	0.7988
Ames2333:81FE8ABXX:1:250031874	0.0727	0.1208	0.8066
